# Supplementary material
Source: Springer Nature journal article supplement (https://www.springermedizin.de/resource/supplementary/12889_2013_5661_MOESM1_ESM.docx/9495972)
Supplement: MOESM1 [file 9495972]

Table 1: Sample demographics

|  |  | **N** | **%** |
| --- | --- | --- | --- |
| Sex | Male  Female  **TOTAL** | 362  607  **969** | 37.4  62.6  **100.0** |
| Primary role | Curtin undergraduate student  Curtin postgraduate student  Curtin General/Professional staff member  Curtin Academic staff member  **TOTAL** | 599  141  132  97  **969** | 61.8  14.6  13.6  10.0  **100.0** |
|  |  |  |  |
| International student status | Yes  No  **TOTAL** | 157  580  **737** | 21.3  78.7  **100** |
|  |  |  |  |
